# Supplementary material for: Investigating sources of variability in closing the terrestrial water balance with remote sensing
Source: Copernicus journal article supplement (doi:10.5194/hess-2023-81), 2023-04-17

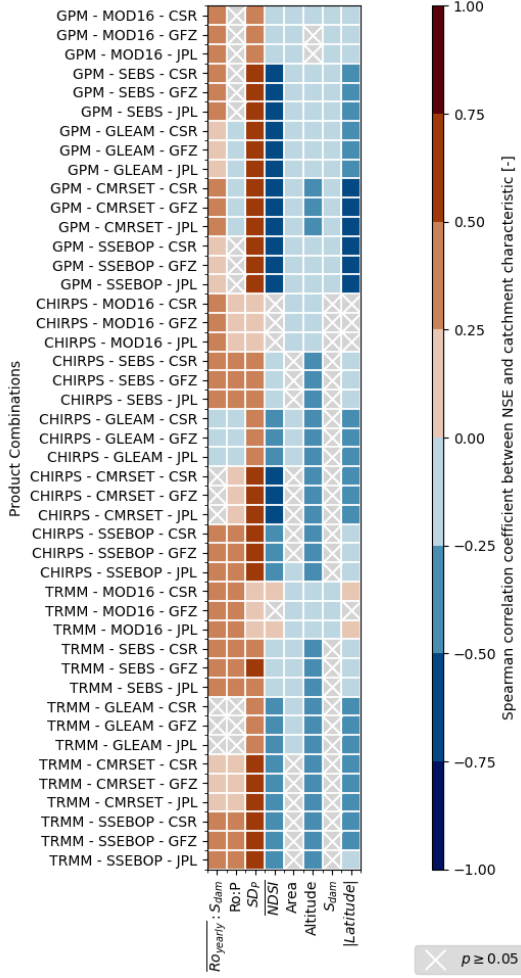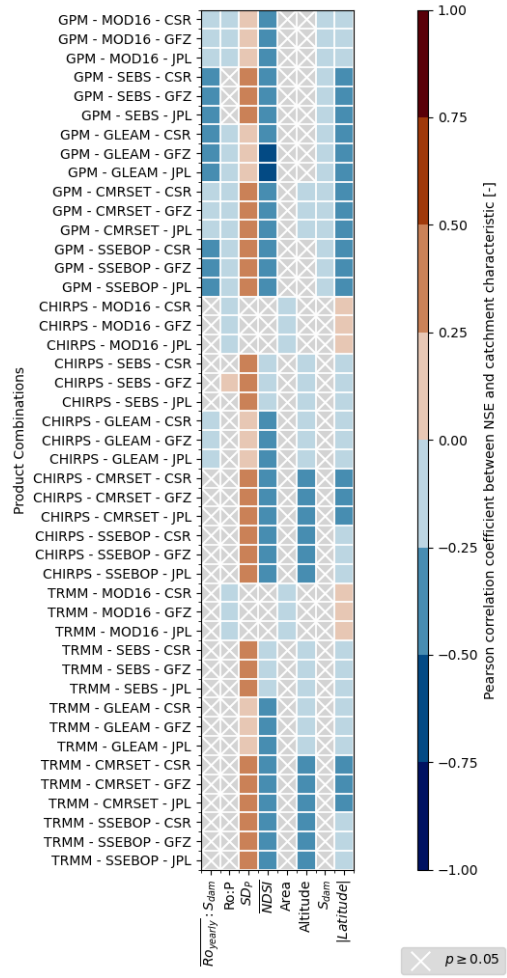

Supplement: Supplementary file [file hess-2023-81-AC3-supplement.pdf]
